# Supplementary material for: Nano-goethite-mediated transformation of anthracene derivatives under low moisture conditions
Source: Royal Society of Chemistry journal article supplement (doi:10.1039/d1en00570g), 2021-11-25
Supplement: d1en00570g1.pdf [file d1en00570g1.pdf]

1 [\*Electronic supplementary information\*](#)

2 **Nano-goethite-mediated transformation of anthracene derivatives under low**

3 **moisture conditions**

4 Pengfei Cheng,<sup>a</sup> Wei Zhang,<sup>b</sup> Xuqiang Zhao,<sup>a</sup> Bing Yang<sup>a</sup> and Yanzheng Gao<sup>a\*</sup>

5 <sup>a</sup> Institute of Organic Contaminant Control and Soil Remediation, College of Resources

6 and Environmental Sciences, Nanjing Agricultural University, Nanjing 210095, China

7 <sup>b</sup> Department of Plant, Soil and Microbial Sciences, and Environmental Science and

8 Policy Program, Michigan State University, East Lansing, Michigan 48824, United

9 States

10 \*Corresponding author: Yanzheng Gao, Dr/Prof

11 Tel: +86-2584395019

12 ORCID No.: 0000-0002-3814-3555

13 E-mail: gaoyanzheng@njau.edu.cn, gaosoil@163.com

14 **Contents:**

15 [S1. Supplemental methods](#)

16 [S2. Supplemental results](#)

17 [18 pages, 9 figures, 5 tables](#)

18

19

## 21 **S1. Supplemental methods**

### 22 **Nao-goethite synthesis**

23       The Goe-03 nano-goethite sample was synthesized as follows. Five mL of 5 M  
24 KOH was mixed with 250 mL of 0.1 M  $\text{Fe}(\text{NO}_3)_3 \cdot 9\text{H}_2\text{O}$  in a beaker under magnetic  
25 stirring. The mixture was aged at 60 °C for 70 h. Next, the cooled mixture was  
26 transferred into a dialysis tube (MD34 (7000)), which was then placed into a 2-L beaker  
27 filled with ultrapure water. The ultrapure water was replaced 10 times each day until the  
28 conductivity was less than  $1.0 \mu\text{S} \cdot \text{cm}^{-1}$ . The product was dried at 80 °C for 4 h, and  
29 then at 50 °C for 2 h.

30       The Goe-02 nano-goethite sample was synthesized by reacting 30 mL of 0.5 M  
31  $\text{Fe}(\text{NO}_3)_3 \cdot 9\text{H}_2\text{O}$  with 125 mL of 2.5 M KOH, followed by aging at 60 °C for 100 h. The  
32 aged suspension was washed as abovementioned and then dried at 40 °C overnight to  
33 obtain the final product.

34       The Goe-01 nano-goethite sample was synthesized by adding rapidly 180 mL of 5  
35 M KOH to 100 mL of 1 M  $\text{Fe}(\text{NO}_3)_3 \cdot 9\text{H}_2\text{O}$  under magnetic stirring, followed by  
36 immediate dilution of to 2 L with ultrapure water and subsequent aging at 70 °C for 60  
37 h. The aged suspension was washed and dried as abovementioned.

### 38 **Nao-goethite characterization**

39       Specific surface areas of the nano-goethite samples were measured by the  
40 Brunauer-Emmett-Teller (BET) gas adsorption isotherms with water vapor using a  
41 surface area and porosimetry analyzer (Micromeritics ASAP 2460). The water vapor

adsorption curves and gravimetric water content for each sample at 20 °C were obtained at vapor pressure of  $P/P_0=0-0.1$ . X-ray diffraction (XRD) analysis was performed using a Bruker Discover diffractometer operating at 40 kV and 40 mA with Cu K $\alpha$  radiation ( $\alpha = 1.54 \text{ \AA}$ ) in a  $2\theta$  range from 5° to 80° at a scan rate of 0.05°/s. The morphological features of nano-goethite were observed using a transmission electron microscope system (JEM-2100; JEOL, Tokyo, Japan) at 200KV. The nano-goethite were mixed with KBr on a mass ratio of 1:100 before analysis using a FTIR spectrometer (Nicolet NEXUS870; Thermo Scientific).

#### **Electron paramagnetic resonance (EPR) measurements**

All samples were analyzed at room temperature with an X-band microwave frequency of 9.81 GHz, and microwave power of 20.0 mW. The instrument and operating parameters were set as follows: at center field, 3503 G; sweep width, 200 G; resolution of 1024 points; receiver gain of  $3.17 \times 10^3$ ; modulation frequency of 100 kHz; modulation amplitude, 1 G; time constant, 39.06 ms; sweep time, 40.00 s.

#### **Calculation of water film coverage**

The theoretical length of three sides in a water molecule were calculated as 3.97, 3.27 and 3.04 Å, and three van der Waals molecular surface area are 9.95, 12.06 and 12.99 Å<sup>2</sup>. Thus, the total areas of water molecules in 1.0 g of goethite were 160–209, 223–291, 283–369, 483–621 m<sup>2</sup> at 4.8%, 6.7, 8.5% and 14.5% water content. According to the BET specific surface area (138 m<sup>2</sup>/g) of nano-goethite (Goe-03), it is roughly estimated that mono-layer water film may form on the surface of nano-goethite with

- 63 4.8% and 6.7% water content. By contrast, at 8.5% and 14.5% water content multi-layer
- 64 water film may cover the surface of nano-goethite.

## 66 S2. Supplemental Results

67

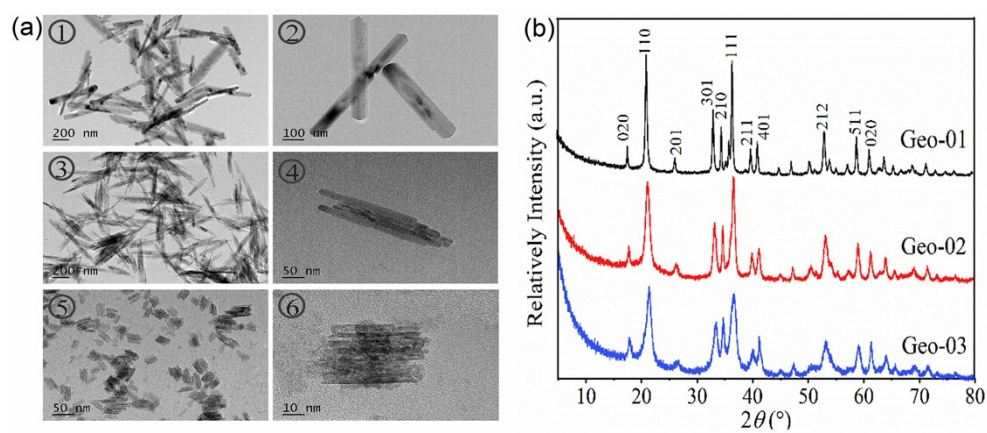

68

69 **Fig. S1** (a) TEM images showing aggregation of goethite nanorods in 87.0 nm (①, ②)  
 70 Geo-01 sample, (③, ④) 22.7 nm Geo-02 sample, (⑤, ⑥) 11.1 nm Geo-03 sample.  
 71 (b) XRD patterns of nano-goethite samples of different sizes.

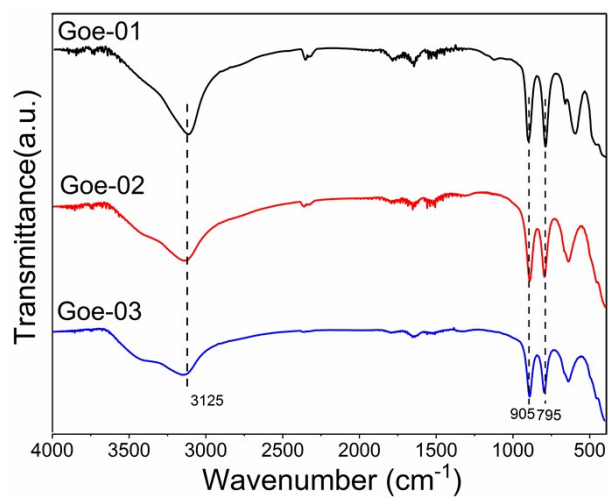

73

74

**Fig. S2** FTIR spectra of nano-goethite samples of different sizes.

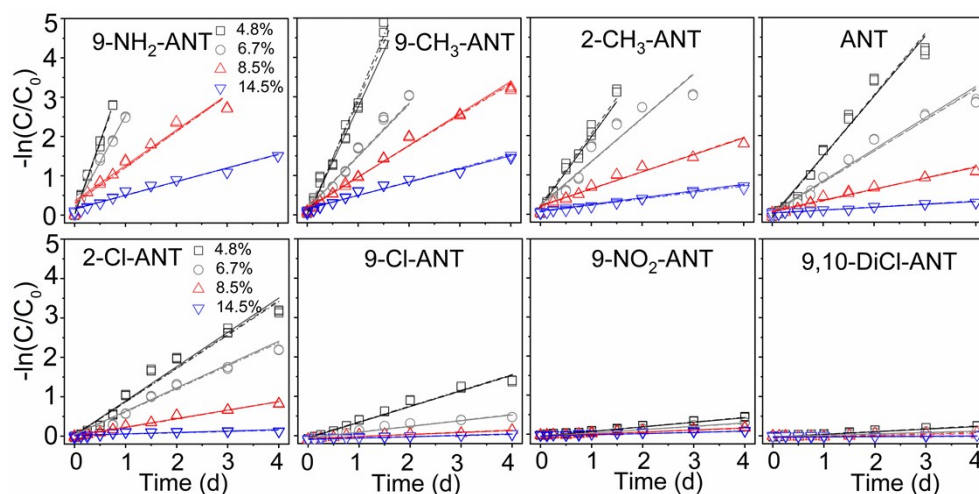

76

77 **Fig. S3** Transformation kinetics of ANT and ANT derivatives on nano-goethite (Goe-  
 78 03) at different water content and 20 °C. The kinetic data were fitted to the first-order  
 79 kinetic model, and the fitting parameters are summarized in [Table S3](#).

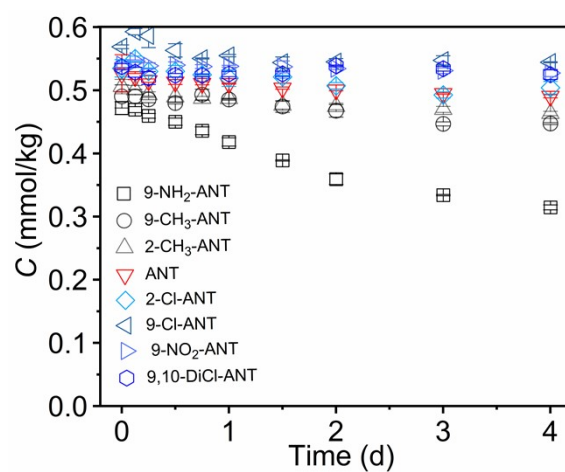

81

82 **Fig. S4** Transformation of ANT and ANT derivatives on silica powder with 0.6% water

83 content at 10% relatively humidity and 20 °C.

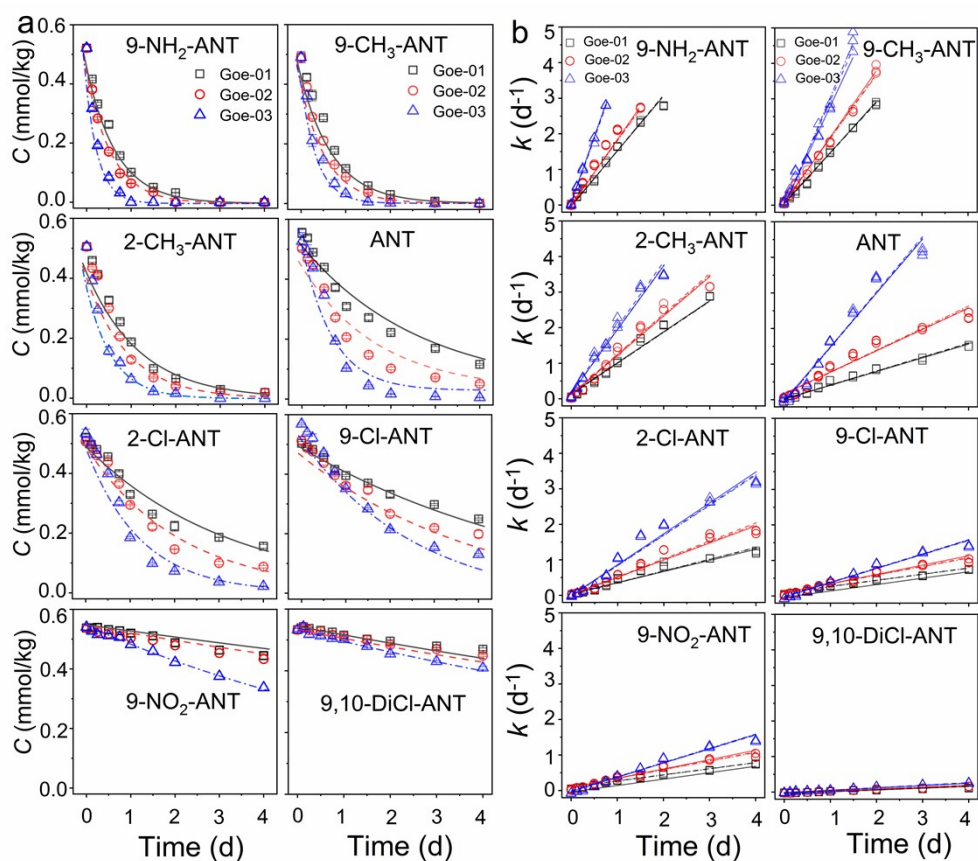

84

85 **Fig. S5** (a) Transformation kinetics of 0.5 mmol/kg ANT and ANT derivatives on Goe-  
 86 01, Goe-02, and Goe-03 nano-goethite samples with water content of 2.3%, 3.1%, and  
 87 4.8%, respectively. (b) The transformation kinetics were fitted to the first-order kinetic  
 88 model, and the fitting parameters are summarized in [Table S4](#).

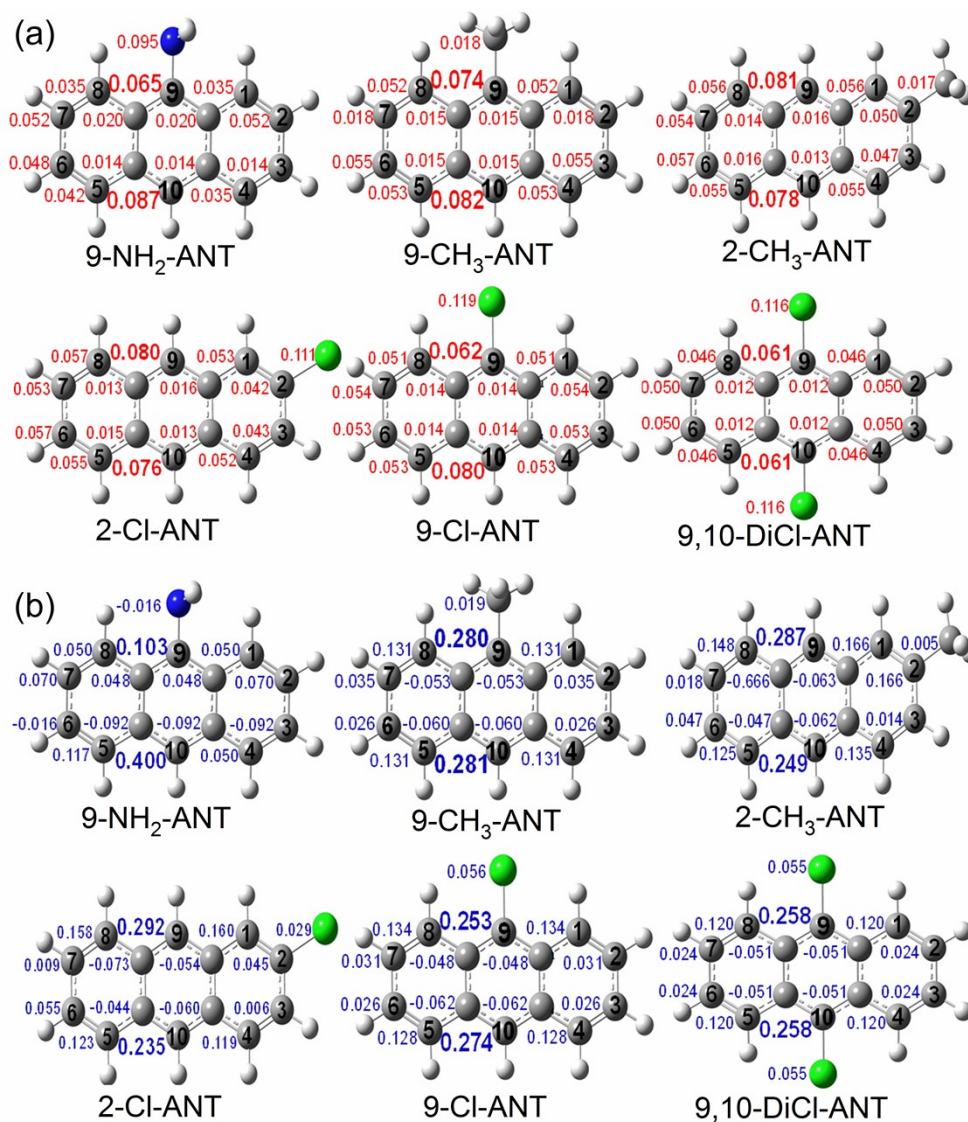

90

91 **Fig. S6** (a) Fukui functions of 9-NH<sub>2</sub>-ANT, 9-CH<sub>3</sub>-ANT, 2-CH<sub>3</sub>-ANT, 2-Cl-ANT, 9-Cl-  
 92 ANT and 9,10-DiCl-ANT. (b) Mulliken atomic spin densities of 9-NH<sub>2</sub>-ANT, 9-CH<sub>3</sub>-  
 93 ANT, 2-CH<sub>3</sub>-ANT, 2-Cl-ANT, 9-Cl-ANT and 9,10-DiCl-ANT.

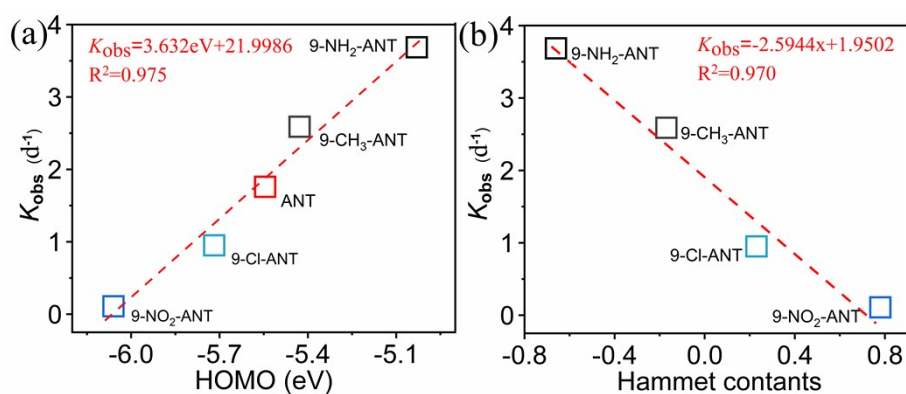

95

96 **Fig. S7** (a) The first-order rate constants of 9-NH<sub>2</sub>-ANT, 9-CH<sub>3</sub>-ANT, ANT, 9-Cl-ANT,  
 97 and 9-NO<sub>2</sub>-ANT as function of HOMO energy. (b) The first-order rate constants of 9-  
 98 NH<sub>2</sub>-ANT, 9-CH<sub>3</sub>-ANT, 9-Cl-ANT, and 9-NO<sub>2</sub>-ANT as function of Hammett constants  
 99 of their substitution groups.

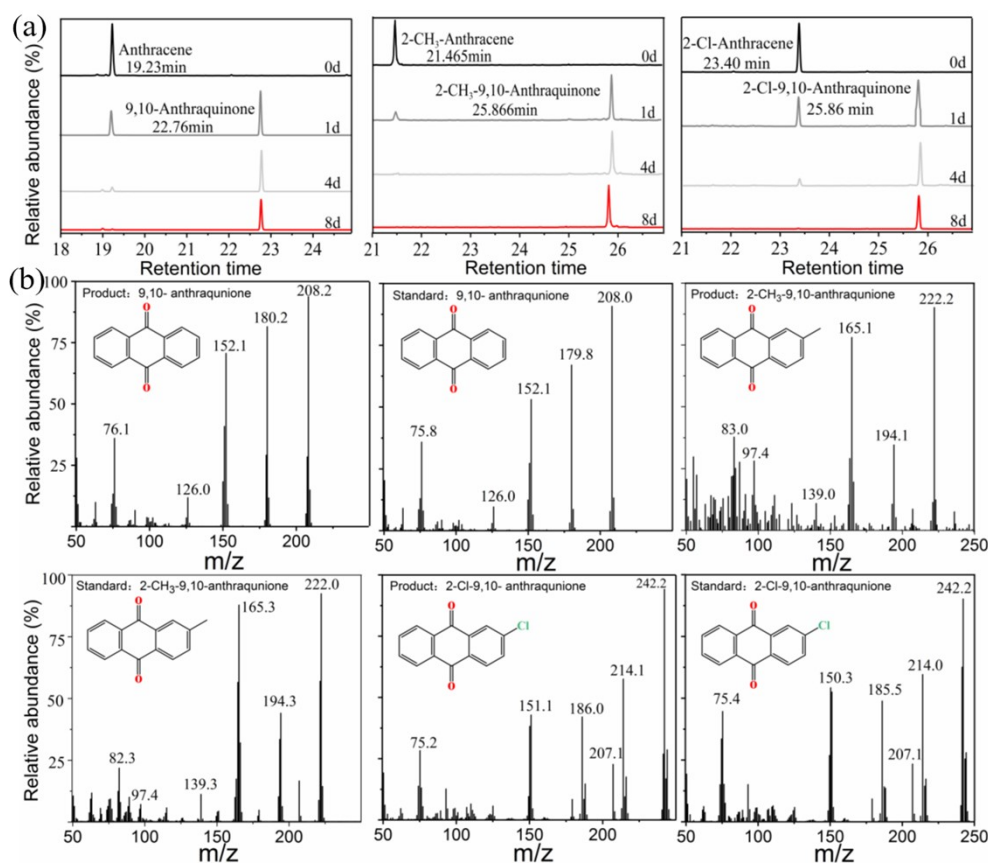

101

102 **Fig. S8** (a) GC-MS chromatograms of 1:1 acetone/dichlormethane extract of  
 103 Goethite/ANT, 2-Cl-ANT, 2-CH<sub>3</sub>-ANT reaction mixture after 1 d, 4 d, and 8 d. (b) GC-  
 104 MS chromatograms of transformation products (9,10-anthraquinone, 2-Cl-9,10-  
 105 anthraquinone, 2-CH<sub>3</sub>-9,10-anthraquinone).

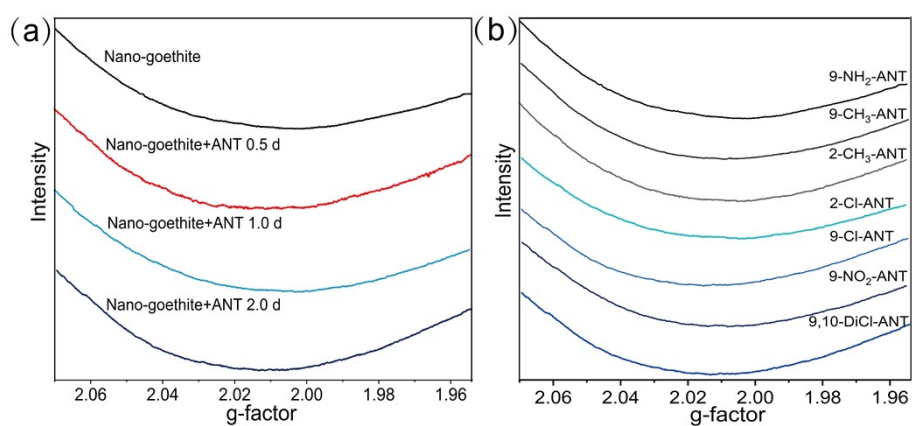

107

108 **Fig. S9** EPR spectra of original nano-goethite and nano-goethite reacted with ANT for

109 0.5, 1, and 2 d, and with ANT derivatives for 1 d.

110 **Table S1.** Physical and chemical properties of ANT, ANT derivatives and  
 111 transformation products.

| Compounds                   | Formulae                                        | Boiling point (°C) | Log $K_{ow}$ | Vapor pressure (mmHg) | Solubility (mg L <sup>-1</sup> ) |
|-----------------------------|-------------------------------------------------|--------------------|--------------|-----------------------|----------------------------------|
| 9-aminoanthracene           | C <sub>14</sub> H <sub>11</sub> N               | 402.2±14.0         | 3.43         | 4.05E <sup>-006</sup> | 4.3430                           |
| 9-methylanthracene          | C <sub>15</sub> H <sub>12</sub>                 | 347.2±0.0          | 5.07         | 4.00E <sup>-05</sup>  | 0.2610                           |
| 2-methylanthracene          | C <sub>15</sub> H <sub>12</sub>                 | 353.5±9.0          | 5.00         | 5.34E <sup>-06</sup>  | 0.0213                           |
| anthracene                  | C <sub>14</sub> H <sub>10</sub>                 | 337.4±9.0          | 4.45         | 6.53E <sup>-06</sup>  | 0.0434                           |
| 2-chloroanthracene          | C <sub>14</sub> H <sub>9</sub> Cl               | 370.1±11.0         | 4.99         | 2.56E <sup>-005</sup> | 0.1601                           |
| 9-chloroanthracene          | C <sub>14</sub> H <sub>9</sub> Cl               | 370.1±11.0         | 4.99         | 2.56E <sup>-005</sup> | 0.1601                           |
| 9-nitroanthracene           | C <sub>14</sub> H <sub>9</sub> NO <sub>2</sub>  | 402.9±14.0         | 1.96         | 5.09E <sup>-014</sup> | 53.5100                          |
| 9,10-dichloroanthracene     | C <sub>14</sub> H <sub>8</sub> Cl <sub>2</sub>  | 401.3±18.0         | 5.63         | 6.20E <sup>-006</sup> | 0.0294                           |
| 9,10-anthraquinone          | C <sub>14</sub> H <sub>8</sub> O <sub>2</sub>   | 377.0±12.0         | 3.39         | 1.16E <sup>-007</sup> | 3.9230                           |
| 2-methyl-9,10-anthraquinone | C <sub>16</sub> H <sub>12</sub> O <sub>2</sub>  | 415.4±35.0         | 4.37         | 2.67E <sup>-006</sup> | 0.4049                           |
| 2-chloro-9,10-anthraquinone | C <sub>14</sub> H <sub>7</sub> ClO <sub>2</sub> | 425.7±34.0         | 3.99         | 2.36E <sup>-006</sup> | 0.7905                           |

112 Note: the boiling point, log $K_{ow}$ , vapor pressure, and solubility values for ANT, ANT derivatives and  
 113 degradation products were form <http://www.chemspider.com/>.

115 **Table S2.** The recovery percentage, relative standard deviation (RSD), and detection  
 116 limits of ANT and ANT derivatives for the extraction and analytical methods in this  
 117 study.

| Compounds                             | 0.50 mmol/kg |      | 0.05 mmol/kg |      | Detection limit<br>ug/L |
|---------------------------------------|--------------|------|--------------|------|-------------------------|
|                                       | Recovery %   | RSD  | Recovery %   | RSD  |                         |
| 9-NH <sub>2</sub> -ANT                | 97.37        | 5.80 | 96.62        | 1.74 | 0.53                    |
| 9-CH <sub>3</sub> -ANT                | 96.13        | 3.34 | 96.61        | 2.89 | 0.12                    |
| 2-CH <sub>3</sub> -ANT                | 99.19        | 2.01 | 96.19        | 1.82 | 0.05                    |
| ANT                                   | 100.98       | 4.53 | 98.29        | 4.09 | 0.15                    |
| 2-Cl-ANT                              | 100.78       | 2.00 | 98.33        | 3.57 | 0.19                    |
| 9-Cl-ANT                              | 99.69        | 1.83 | 98.96        | 1.42 | 0.26                    |
| 9-NO <sub>2</sub> -ANT                | 105.90       | 0.66 | 97.50        | 1.55 | 0.21                    |
| 9,10-DiCl-ANT                         | 104.43       | 1.42 | 96.9         | 1.80 | 0.40                    |
| 9,10-anthraquinone                    | 97.92        | 2.42 | 97.35        | 5.64 | 2.00                    |
| 2-CH <sub>3</sub> -9,10-anthraquinone | 97.99        | 2.50 | 96.83        | 6.11 | 2.71                    |
| 2-Cl-9,10-anthraquinone               | 98.04        | 1.78 | 96.19        | 4.56 | 2.24                    |

119 **Table S3.** The fitted first-order kinetic parameters of ANT and ANT derivatives on nano-goethite (Goe-03) at different water content.

120 The mean is the average value of the fitted first-order kinetic parameters, and SD is the standard deviation from the triplicate experiments.

| Compounds              | 4.8%       |       |       |       | 6.7%       |       |       |        | 8.5%       |       |       |       | 14.5%      |       |       |       |
|------------------------|------------|-------|-------|-------|------------|-------|-------|--------|------------|-------|-------|-------|------------|-------|-------|-------|
|                        | $k/d^{-1}$ |       | $R^2$ |       | $k/d^{-1}$ |       | $R^2$ |        | $k/d^{-1}$ |       | $R^2$ |       | $k/d^{-1}$ |       | $R^2$ |       |
|                        | Mean       | SD    | Mean  | SD    | Mean       | SD    | Mean  | SD     | Mean       | SD    | Mean  | SD    | Mean       | SD    | Mean  | SD    |
| 9-NH <sub>2</sub> -ANT | 3.681      | 0.034 | 0.998 | 0.001 | 1.815      | 0.008 | 0.976 | 0.0004 | 0.907      | 0.008 | 0.985 | 0.001 | 0.346      | 0.003 | 0.975 | 0.002 |
| 9-CH <sub>3</sub> -ANT | 2.941      | 0.152 | 0.986 | 0.005 | 1.335      | 0.009 | 0.991 | 0.002  | 0.796      | 0.013 | 0.991 | 0.002 | 0.339      | 0.008 | 0.977 | 0.009 |
| 2-CH <sub>3</sub> -ANT | 1.802      | 0.018 | 0.979 | 0.006 | 1.113      | 0.008 | 0.925 | 0.001  | 0.436      | 0.005 | 0.964 | 0.003 | 0.169      | 0.006 | 0.993 | 0.006 |
| ANT                    | 1.536      | 0.021 | 0.972 | 0.009 | 0.791      | 0.008 | 0.971 | 0.005  | 0.285      | 0.007 | 0.962 | 0.006 | 0.075      | 0.004 | 0.948 | 0.026 |
| 2-Cl-ANT               | 0.858      | 0.009 | 0.969 | 0.002 | 0.588      | 0.004 | 0.982 | 0.001  | 0.217      | 0.002 | 0.980 | 0.003 | 0.050      | 0.005 | 0.886 | 0.015 |
| 9-Cl-ANT               | 0.397      | 0.004 | 0.975 | 0.005 | 0.147      | 0.003 | 0.946 | 0.010  | 0.052      | 0.002 | 0.902 | 0.049 | 0.036      | 0.002 | 0.887 | 0.042 |
| 9-NO <sub>2</sub> -ANT | 0.119      | 0.001 | 0.993 | 0.002 | 0.085      | 0.003 | 0.996 | 0.002  | 0.051      | 0.002 | 0.964 | 0.012 | 0.031      | 0.002 | 0.936 | 0.023 |
| 9,10-DiCl-ANT          | 0.069      | 0.004 | 0.983 | 0.009 | 0.034      | 0.002 | 0.962 | 0.022  | 0.027      | 0.007 | 0.879 | 0.024 | 0.014      | 0.004 | 0.841 | 0.066 |

**Table S4.** The fitted first-order kinetic parameters of ANT and ANT derivatives on Goe-01, and Goe-02 nano-goethite samples at water content of 2.3%, and 3.1%, respectively. The mean is the average value of the fitted first-order kinetic parameters, and SD is the standard deviation from the triplicate experiments.

| Compounds              | Goe-01     |       |       |       | Goe-02     |       |       |       |
|------------------------|------------|-------|-------|-------|------------|-------|-------|-------|
|                        | $k/d^{-1}$ |       | $R^2$ |       | $k/d^{-1}$ |       | $R^2$ |       |
|                        | Mean       | SD    | Mean  | SD    | Mean       | SD    | Mean  | SD    |
| 9-NH <sub>2</sub> -ANT | 1.561      | 0.024 | 0.995 | 0.002 | 1.875      | 0.026 | 0.994 | 0.004 |
| 9-CH <sub>3</sub> -ANT | 1.425      | 0.021 | 0.996 | 0.002 | 1.816      | 0.048 | 0.996 | 0.002 |
| 2-CH <sub>3</sub> -ANT | 0.872      | 0.002 | 0.979 | 0.002 | 1.117      | 0.015 | 0.972 | 0.007 |
| ANT                    | 0.390      | 0.003 | 0.980 | 0.007 | 0.610      | 0.010 | 0.956 | 0.014 |
| 2-Cl-ANT               | 0.323      | 0.008 | 0.950 | 0.015 | 0.494      | 0.012 | 0.960 | 0.007 |
| 9-Cl-ANT               | 0.175      | 0.005 | 0.982 | 0.006 | 0.250      | 0.012 | 0.965 | 0.017 |
| 9-NO <sub>2</sub> -ANT | 0.038      | 0.002 | 0.964 | 0.014 | 0.046      | 0.003 | 0.987 | 0.005 |
| 9,10-DiCl-ANT          | 0.051      | 0.002 | 0.980 | 0.011 | 0.053      | 0.001 | 0.991 | 0.005 |

**Table S5.** Fitting parameters of Mössbauer spectra of nano-goethite samples before and after reaction with ANT and 9-NO<sub>2</sub>-ANT.

| Samples                                  | Phase          | QS (mm/s) | IS (mm/s) | H (T) | Area (%) |
|------------------------------------------|----------------|-----------|-----------|-------|----------|
| Nano-goethite                            | Fe(II) Doublet | 3.55      | 1.25      | —     | 2.4      |
|                                          | Fe(III) Sixlet | -0.20     | 0.26      | 38.56 | 97.6     |
| Nano-goethite<br>+ANT                    | Fe(II) Doublet | 3.38      | 1.41      | —     | 5.2      |
|                                          | Fe(III) Sixlet | -0.27     | 0.25      | 38.02 | 94.8     |
| Nano-goethite<br>+9-NO <sub>2</sub> -ANT | Fe(II) Doublet | 3.06      | 1.43      | —     | 4.2      |
|                                          | Fe(III) Sixlet | -0.27     | 0.25      | 38.74 | 95.8     |

QS: quadrupole splitting; IS: isomer shifts; H: Hyperfine field; Area: relative phase abundance in %.
